# Supplementary material for: Mindfulness-Based Interventions and Cardiovascular Risk Factors in US Racial/Ethnic Minority Populations: A Systematic Review of Implementation Data to Address Health Disparities
Source: Research Square preprint supplement (doi:10.21203/rs.3.rs-557519/v1), 2021-05-28

**Appendix 1: Search Strategy**

|  | | |
| --- | --- | --- |
| **PubMed – Date 02/09/2020** | | |
| ID | Search terms | Hits |
| 1 | meditation[MeSH Terms]) OR mindful*[Title/Abstract]) OR meditat*[Title/Abstract] | 14017 |
| 2 | "randomized controlled trial"[Publication Type]) OR "controlled clinical trial"[Publication Type]) OR random*[Title/Abstract] | 1,313,459 |
| Results | Search #1 AND #2 with limiters: “Humans”, “English”, “Adults” | 1779 |
| **EMBASE - Date 02/09/2020** | | |
| ID | Search terms | Hits |
| 1 | (‘meditation’/exp/mj OR ‘mindfulness’/exp.mj OR meditat*:ab,ti OR mindful*:ab,ti) AND ([controlled clinical trial]/lim OR [randomized controlled trial]/lim) AND [adult]/lim | 1293 |
| **PsycINFO - Date 02/09/2020** | | |
| ID | Search terms | Hits |
| 1 | MA ( meditation or mindfulness ) OR TI meditat* OR AB meditat* OR TI mindful* OR AB mindful* AND PT randomized controlled trials  Limiters: English, Human, Adults | 5241 |
| **CINAHL - Date 02/09/20** | | |
| ID | Search terms | Hits |
| 1 | MH meditation OR MH mindfulness OR TI meditat* OR AB meditat* OR TI mindful* OR AB mindful*  Limiters: Adults, Clinical Trials, Randomized Controlled Trials, English, USA | 303 |
| **Cochrane Central Register of Controlled Trials - Date 02/09/20** | | |
| ID | Search terms | Hits |
| 1 | MeSH descriptor: [Meditation] this term only OR MeSH descriptor: [Mindfulness] this term only OR (meditat*):ti,ab,kw OR (mindful*):ti,ab,kw AND (randomized*):pt  Limiter: in trials | 2014 |

**Appendix 2: Oxford Implementation Index (short form)**


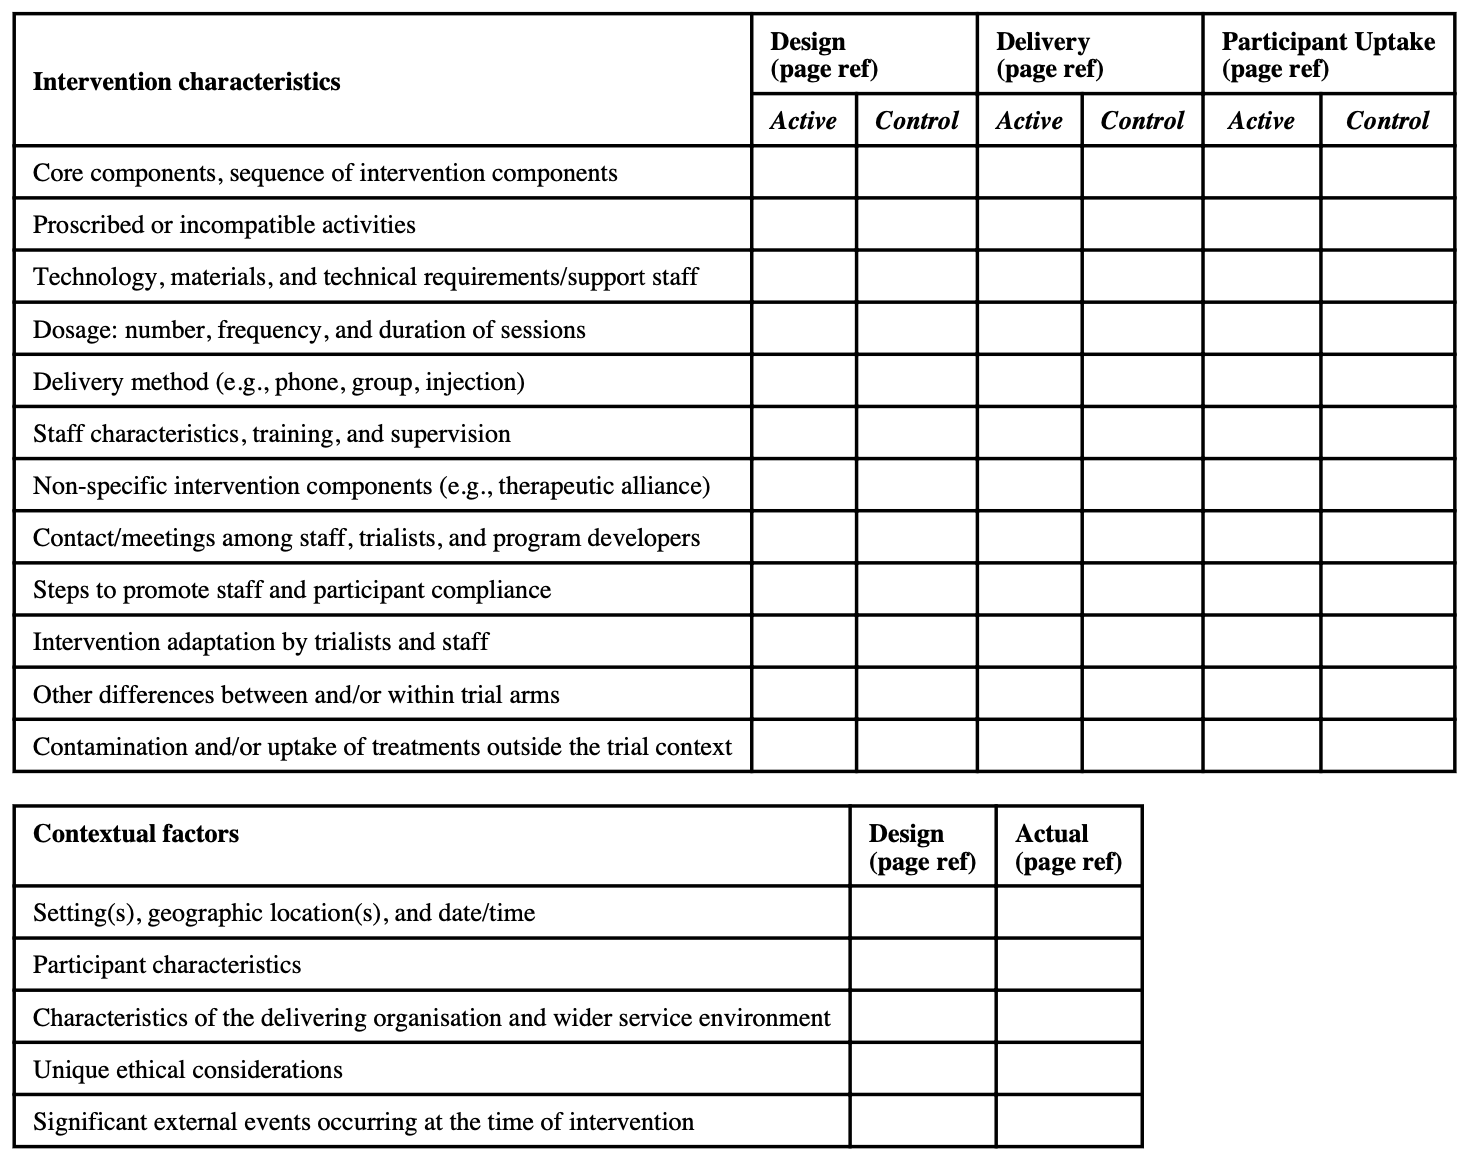

Supplement: Supplementary file 1 [file 5690e4232293cfe06a275ed7.docx]
